# Supplementary material for: Room temperature phosphorescence vs. thermally activated delayed fluorescence in carbazole–pyrimidine cored compounds
Source: Royal Society of Chemistry journal article supplement (doi:10.1039/c8tc02554a), 2018-01-01
Supplement: c8tc02554a1.pdf [file c8tc02554a1.pdf]

## ***Electronic Supplementary Information***

# **Room temperature phosphorescence vs thermally activated delayed fluorescence in carbazole – pyrimidine cored compounds**

Tomas Serevičius<sup>a\*</sup>, Tadas Bučiūnas<sup>a</sup>, Jonas Bucevičius<sup>b</sup>, Jelena Dodonova<sup>b</sup>, Sigitas  
Tumkevičius<sup>b</sup>, Karolis Kazlauskas<sup>a</sup> and Saulius Juršėnas<sup>a</sup>

<sup>[a]</sup> *Institute of Photonics and Nanotechnology, Faculty of Physics, Vilnius University, Sauletekio 3, LT-10257 Vilnius,  
Lithuania*

<sup>[b]</sup> *Institute of Chemistry, Faculty of Chemistry and Geosciences, Vilnius University, Sauletekio 3, LT-10257, LT-03225  
Vilnius, Lithuania*

\*corresponding author: tomas.serevicius@tmi.vu.lt

**Table S1** Peak positions of absorption, fluorescence and phosphorescence spectra of the compounds **1a-d** in 1 w.t.% Zeonex and PMMA thin films.

|           | $\lambda_{\text{ABS}}^{\text{Zeonex}}$<br>(nm) <sup>[a]</sup> | $\lambda_{\text{ABS}}^{\text{PMMA}}$<br>(nm) <sup>[b]</sup> | $\lambda_{\text{FL}}^{\text{Zeonex}}$<br>(nm) <sup>[c]</sup> | $\lambda_{\text{FL}}^{\text{PMMA}}$<br>(nm) <sup>[d]</sup> | $\lambda_{\text{PH}}^{\text{Zeonex}}$<br>(nm) <sup>[e]</sup> | $\lambda_{\text{PH}}^{\text{PMMA}}$<br>(nm) <sup>[f]</sup> |
|-----------|---------------------------------------------------------------|-------------------------------------------------------------|--------------------------------------------------------------|------------------------------------------------------------|--------------------------------------------------------------|------------------------------------------------------------|
| <b>1a</b> | 352                                                           | 342                                                         | 384                                                          | 404                                                        | 460                                                          | 461                                                        |
| <b>1b</b> | 355                                                           | 342                                                         | 388                                                          | 404                                                        | 463                                                          | 463                                                        |
| <b>1c</b> | 362                                                           | 362                                                         | 394                                                          | 420                                                        | 475                                                          | 460                                                        |
| <b>1d</b> | 358                                                           | 344                                                         | 435                                                          | 475                                                        | 477                                                          | 488                                                        |

<sup>[a], [c], [e]</sup> Absorption, fluorescence and phosphorescence spectrum maximum, respectively, in 1 w.t. % Zeonex film.

<sup>[b], [d], [f]</sup> Absorption, fluorescence and phosphorescence spectrum maximum, respectively, in 1 w.t. %PMMA film.

**Table S2** Orbital composition of  $S_0 \rightarrow T_1$  and  $S_0 \rightarrow T_2$  transitions with fractional contribution values for carbazole-pyrimidine compounds **1a-1d**. The main transitions are indicated in bold.

| $S_0 \rightarrow T_1$ |                                           | $S_0 \rightarrow T_2$ |                                         |             |
|-----------------------|-------------------------------------------|-----------------------|-----------------------------------------|-------------|
| Transition            | Contribution (%)                          | Transition            | Contribution (%)                        |             |
| <b>1a</b>             | HOMO-5 $\rightarrow$ LUMO                 | 0.13                  | HOMO-1 $\rightarrow$ LUMO+1             | 0.02        |
|                       | HOMO-1 $\rightarrow$ LUMO                 | 0.02                  | HOMO-3 $\rightarrow$ LUMO               | 0.10        |
|                       | HOMO-3 $\rightarrow$ LUMO+1               | 0.07                  | HOMO-1 $\rightarrow$ LUMO               | 0.04        |
|                       | <b>HOMO-1<math>\rightarrow</math>LUMO</b> | <b>0.61</b>           | HOMO-1 $\rightarrow$ LUMO+1             | 0.08        |
|                       | HOMO $\rightarrow$ LUMO                   | 0.04                  | <b>HOMO<math>\rightarrow</math>LUMO</b> | <b>0.75</b> |
|                       | HOMO-1 $\rightarrow$ LUMO+1               | 0.12                  |                                         |             |
| <b>1b</b>             | HOMO-11 $\rightarrow$ LUMO                | 0.11                  | HOMO-10 $\rightarrow$ LUMO              | 0.08        |
|                       | HOMO-10 $\rightarrow$ LUMO+1              | 0.03                  | HOMO-5 $\rightarrow$ LUMO               | 0.05        |
|                       | LUMO-10 $\rightarrow$ LUMO+4              | 0.03                  | HOMO-1 $\rightarrow$ LUMO+1             | 0.07        |
|                       | HOMO-5 $\rightarrow$ LUMO+1               | 0.19                  | HOMO-1 $\rightarrow$ LUMO+4             | 0.04        |
|                       | <b>HOMO-1<math>\rightarrow</math>LUMO</b> | <b>0.46</b>           | <b>HOMO<math>\rightarrow</math>LUMO</b> | <b>0.76</b> |
|                       | HOMO $\rightarrow$ LUMO+1                 | 0.13                  |                                         |             |
| <b>1c</b>             | HOMO-8 $\rightarrow$ LUMO                 | 0.08                  | HOMO-7 $\rightarrow$ LUMO               | 0.05        |
|                       | HOMO-7 $\rightarrow$ LUMO                 | 0.04                  | HOMO-5 $\rightarrow$ LUMO               | 0.06        |
|                       | HOMO-5 $\rightarrow$ LUMO+1               | 0.03                  | HOMO-1 $\rightarrow$ LUMO               | 0.04        |
|                       | <b>HOMO-1<math>\rightarrow</math>LUMO</b> | <b>0.69</b>           | HOMO-1 $\rightarrow$ LUMO+1             | 0.05        |
|                       | HOMO-1 $\rightarrow$ LUMO+1               | 0.03                  | <b>HOMO<math>\rightarrow</math>LUMO</b> | <b>0.77</b> |
|                       | HOMO $\rightarrow$ LUMO                   | 0.03                  | HOMO $\rightarrow$ LUMO+1               | 0.03        |
| <b>1d</b>             | HOMO-10 $\rightarrow$ LUMO                | 0.02                  | HOMO-7 $\rightarrow$ LUMO               | 0.03        |
|                       | HOMO-7 $\rightarrow$ LUMO+1               | 0.04                  | HOMO-1 $\rightarrow$ LUMO               | 0.03        |
|                       | HOMO-2 $\rightarrow$ LUMO                 | 0.05                  | <b>HOMO<math>\rightarrow</math>LUMO</b> | <b>0.95</b> |
|                       | <b>HOMO<math>\rightarrow</math>LUMO+1</b> | <b>0.77</b>           |                                         |             |
|                       | HOMO $\rightarrow$ LUMO+5                 | 0.08                  |                                         |             |
|                       | HOMO $\rightarrow$ LUMO+7                 | 0.03                  |                                         |             |

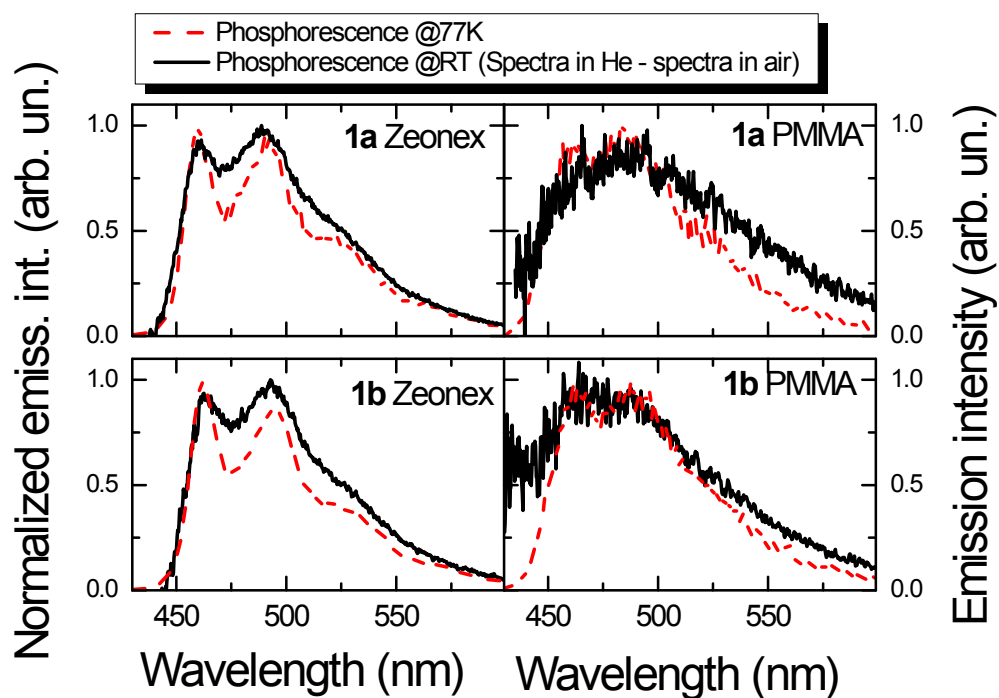

**Fig. S1** Phosphorescence spectra of compounds **1a** and **1b** in 1w.t. % in Zeonex and PMMA films at 77K (red lines) and room temperature (black lines). Room temperature PH spectra were obtained by subtracting the FI spectra obtained in oxygen-saturated ambient from those obtained in oxygen-deficient ambient.

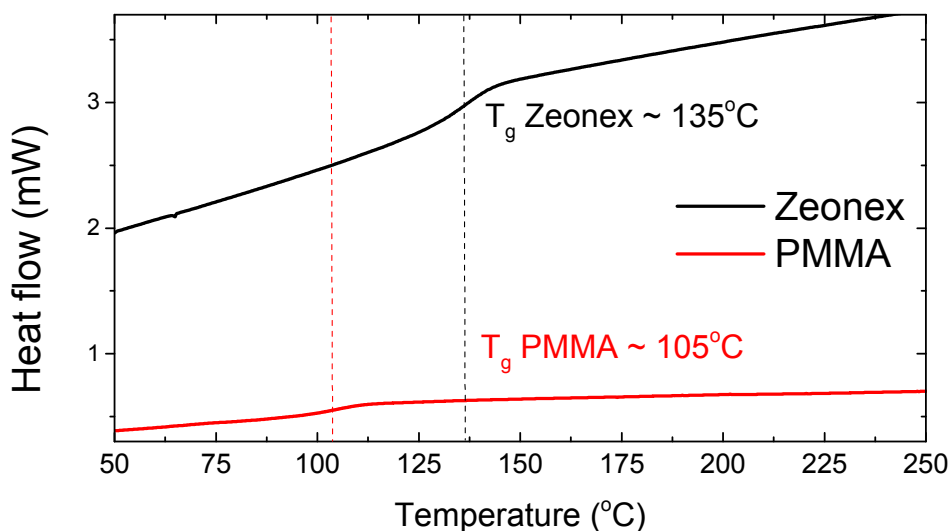

**Fig. S2** Differential scanning calorimetry curves of Zeonex and PMMA.

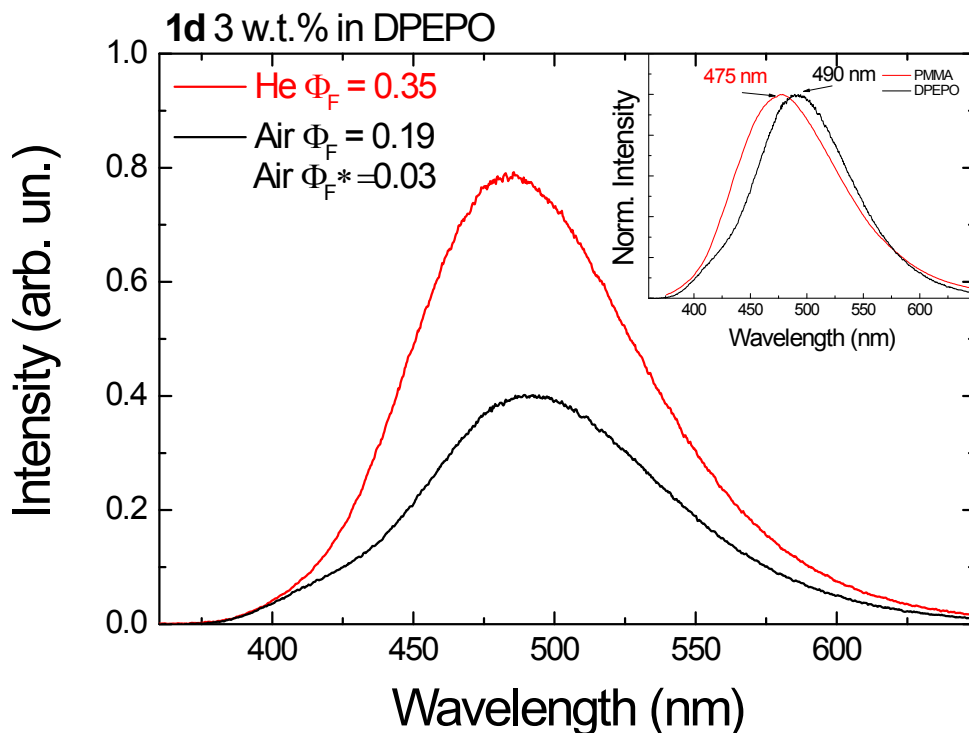

**Fig. S3** Fluorescence spectra of 3 w.t.% DPEPO film of compound **1d** in oxygen-saturated (black line) and oxygen-deficient (red line) ambient.  $\Phi_F$  is a fluorescence quantum yield,  $\Phi_F^*$  - fluorescence quantum yield excluding the TADF part (true  $\Phi_F$  for the prompt fluorescence). Inset shows fluorescence spectra of 3 w.t.% DPEPO (black line) and 1 w.t.% PMMA (red line) films of compound **1d**.

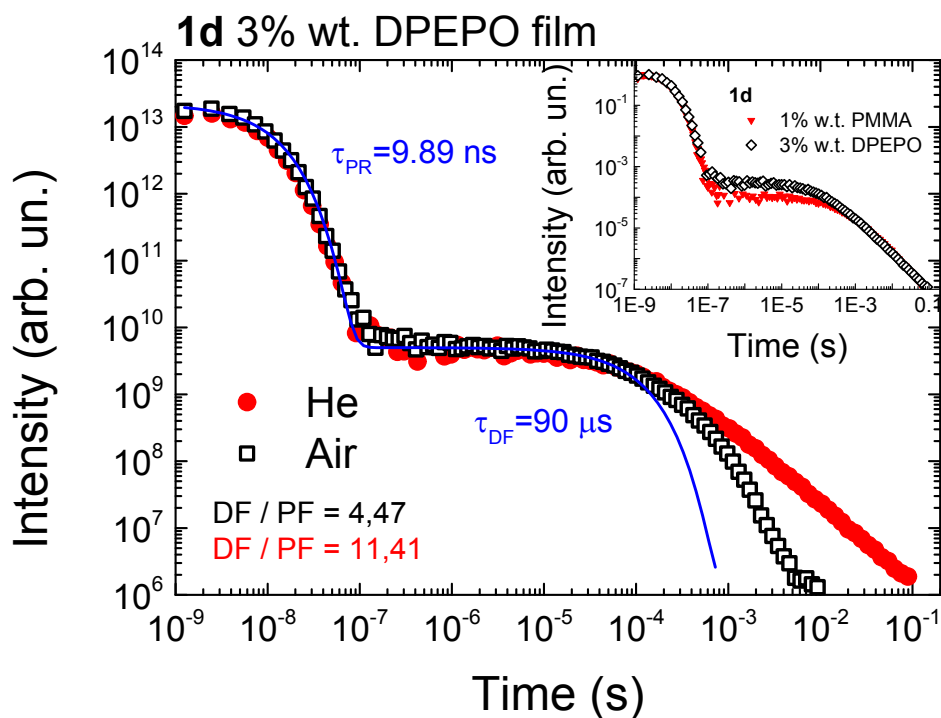

**Fig. S4** Log – log scale photoluminescence decays of 3 w.t.% DPEPO film of compound **1d** in oxygen-saturated and oxygen-deficient ambients. The inset shows the comparison of log – log scale photoluminescence decays of **1d** in 1 w.t.% PMMA film (red triangles) and 3 w.t.% DPEPO film (open squares). Blue line is the bi-exponential fit.

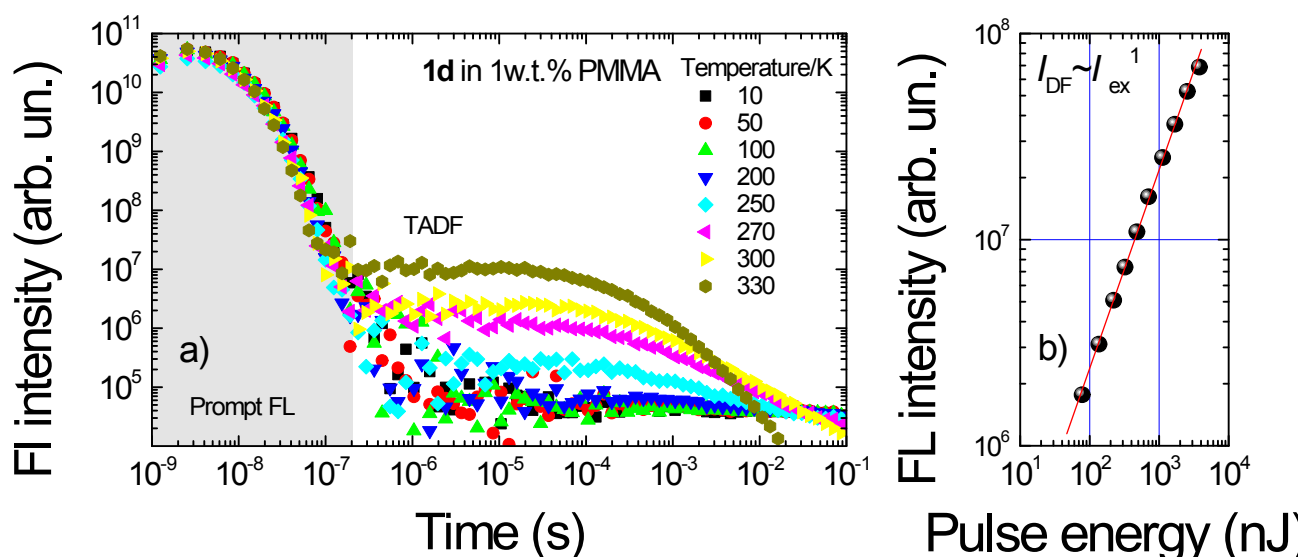

**Fig. S5** a) Log – log scale photoluminescence decays of compound **1d** in 1% w.t. PMMA at various temperatures. The emergency of TADF is clearly seen at the temperatures above  $\sim 200$ K. b) Delayed fluorescence intensity dependence on the laser fluence of compound **1d** in 1% w.t. PMMA. Red line shows linear fit.

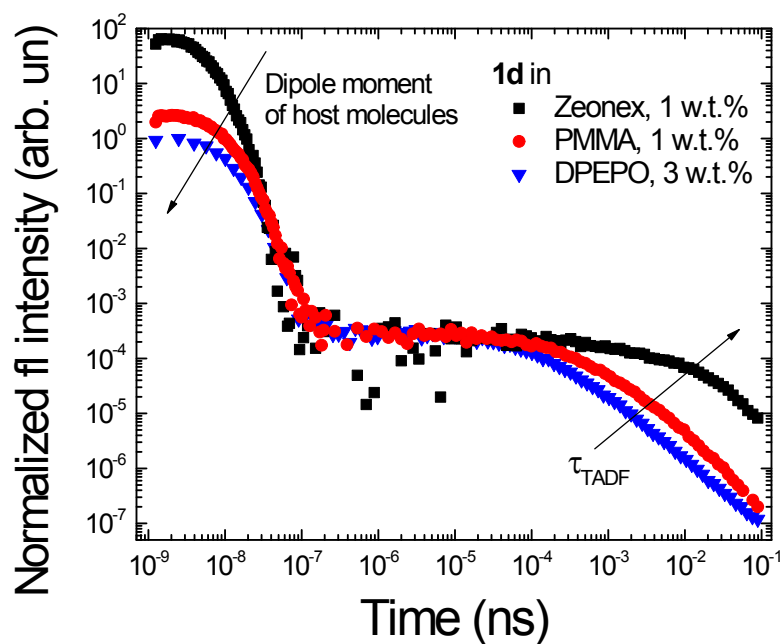

**Fig. S6** Fluorescence decay transients of compound **1d** in diluted Zeonex (black figures), PMMA (red figures) and DPEPO (blue figures) films. Transients were normalized to initial intensity of delayed fluorescence. Clear trend of decrease of delayed fluorescence lifetime ( $\tau_{TADF}$ ) upon the increase of dipole moment of host molecules is observed.

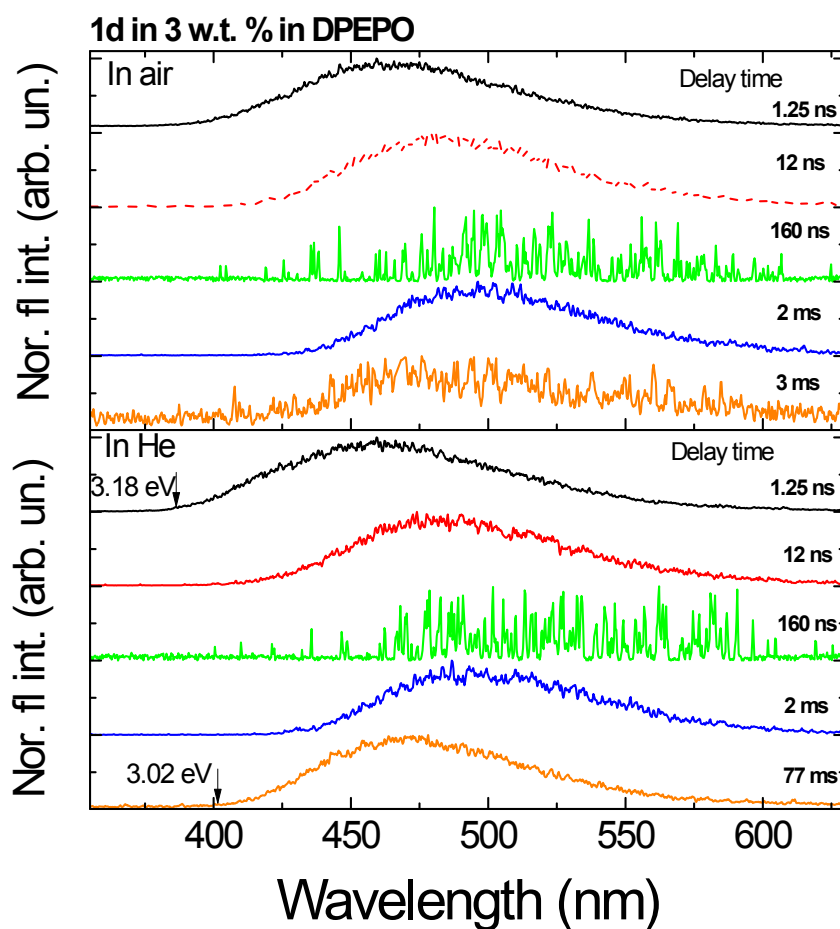

**Fig. S7** Normalized time resolved fluorescence spectra of 3 w.t.% **1d**:DPEPO film in oxygen-saturated (upper picture) and oxygen-deficient (lower picture) ambients. Numbers denotes the delay time. Numbers near the arrows denotes the on-set energies of fluorescence spectra. All spectra were shifted vertically for clarity.

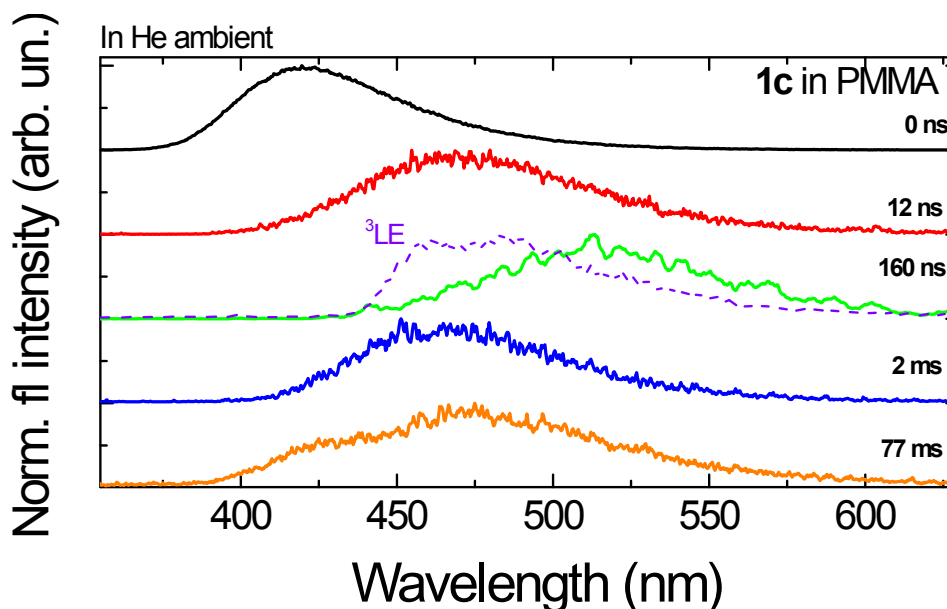

**Fig. S8** Normalized time resolved fluorescence spectra of 1 w.t.% **1c** PMMA film in oxygen-deficient ambient. Numbers denote the delay time. Dotted spectrum is phosphorescence spectra obtained at 77K temperature. All spectra were shifted vertically for clarity.

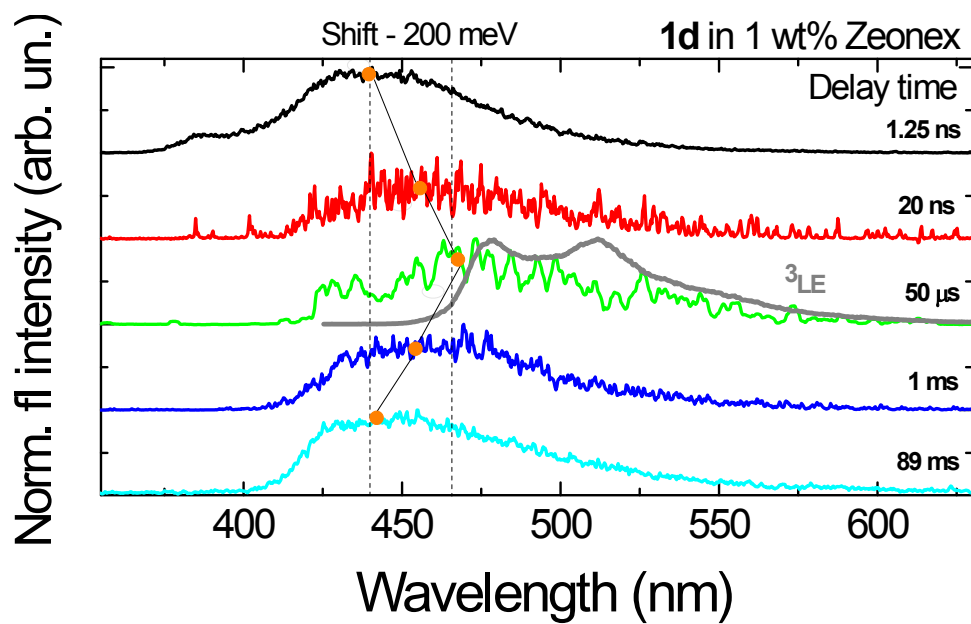

**Fig. S9** Normalized time resolved fluorescence spectra of 1 w.t.% **1d** Zeonex film in oxygen-deficient ambient. Numbers denotes the delay time. Dark grey spectrum is phosphorescence spectra obtained at 77K temperature. All spectra were shifted vertically for clarity.
